# Supplementary material
Source: Springer Nature journal article supplement (https://www.springermedizin.de/resource/supplementary/12939_2013_537_MOESM1_ESM.pdf/9551114)

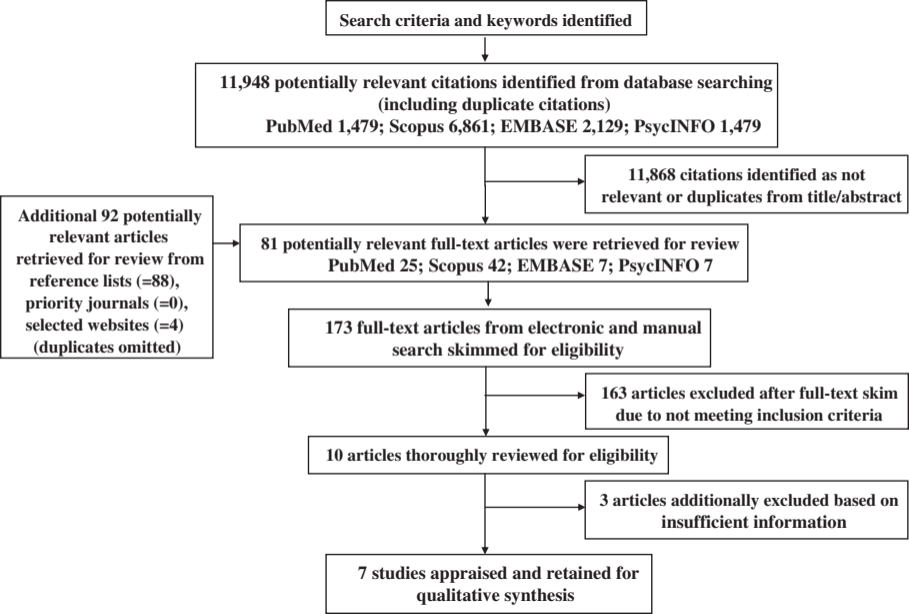

Supplement: MOESM1 [file 9551114]
